# Supplementary material for: Evaluation of a type 2 modified live porcine reproductive and respiratory syndrome vaccine against heterologous challenge of a lineage 3 highly virulent isolate in pigs
Source: PeerJ. 2020 Mar 30;8:e8840. doi: 10.7717/peerj.8840 (PMC7115754; doi:10.7717/peerj.8840)
Supplement: Data S1 [file peerj-08-8840-s001.xlsx]

## Sheet: Body temperature
Ear tag	Group	Body temperature (℃) - DPC																											Fever day
		-5	-4	-3	-2	-1	0	1	2	3	4	5	6	7	8	9	10	11	12	13	14	15	16	17	18	19	20
69	Mock	39.1	39.7	39.1	39.4	39.3	39.3	40	39.2	39.5	39	39.4	39.3	38.9	39	39.3	39.7	39.1	39	39.5	38.9	39.1	39.3	39	39	39	39.1		0
86	Mock	39.7	39.8	40.5	39.8	39.7	39.1	39.1	39.3	39.4	39.3	39.3	39.3	39	39.1	39.1	39.5	39.3	39.3	39.7	39.2	39	39	39	38.9	39.2	39.3		0
89	Mock	39.1	39.2	39.2	39.1	39	39.1	39.2	39.1	39.4	38.6	39	39.1	38.6	38.8	38.9	39.7	39.1	39.1	39.3	39	38.9	38.9	38.8	38.9	39	38.9		0
90	Mock	39.3	39.3	39.7	39.2	39.4	39.1	39.3	39.2	39.2	39	39.2	38.9	38.9	39.1	39	39.2	39	39.1	39.7	39.2	39.1	38.9	38.8	39.1	39	39.1		0
92	Mock	39.4	39.7	39.4	39.1	39.1	39.2	39.7	38.6	39	38.8	38.9	38.9	38.6	39	38.8	39.1	39	38.8	39.2	38.6	38.5	38.9	38.9	39	39	38.9		0
95	Mock	39.3	39.7	39.5	39.8	39.4	39.1	39.4	39.2	39.3	39.2	39.2	39.1	39.2	39.3	39	39.4	39.2	39	39.4	39.2	39.3	39.2	39.1	38.8	39.3	39.3		0
75	UnV	39.4	39.9	39.3	39.3	39.5	39.4	40.9	39.3	39	40	40.4	39.5	39.7	40.5	39.9	40.2	40.7	40.5	39.9	39.9	40	39.5	39.1	38.9	39.1	38.9		6
76	UnV	39.2	39.5	39.4	39.9	39.4	39.5	40.8	39.7	40.4	40.7	40.3	40	40.8	41	39.5	39.9	39.7	39.4	39.2	39.2	39.4	39.3	39.4	39.8	39.3	39.4		6
79	UnV	39.4	39.7	39	39.8	39.1	39.3	40.9	39.3	39.1	39.1	40.5	39.3	39.1	40.4	40.3	39.7	39.3	39.5	39.4	39	38.9	38.9	38.8	39	38.9	39		4
84	UnV	38.9	39.5	39.3	39.1	39.2	38.8	40.8	39.7	39.5	40	39.7	40	40.1	40.1	40.1	39.5	41	41	40.7									7
88	UnV	39.7	39.9	39.7	39.3	40.3	39.7	40.2	39.5	40.4	39.7	40.7	40.5	40.8	40.7	40	39.8	39.2	40.8	40.5	39.5	39.2	39.2	39	39.4	39.1	39.3		8
100	UnV	39.4	39.3	39.3	39.1	39.1	39.3	40.7	39.9	40.7	40.3	40.2	39.7	39.5	40	40	40.2	40.2	39.3	39.4	38.9	39	38.9	39	39.1	38.9	39.1		6
72	MLV	39.4	39.4	39.3	39.2	39.5	39.1	40.2	39.8	40	39.7	39.1	39.1	39.2	39.4	39.4	39.2	39.3	39.2	39.1	39	38.9	39.2	39.1	38.5	39.5	39.2		1
73	MLV	39.4	39.7	39.1	39.3	39.2	39.2	39.7	40.1	39.7	40.1	40	39.4	39.2	40.2	39.7	39.1	39.4	39.9	39.3	39.1	39	39.2	39.1	38.9	39.1	39.3		3
78	MLV	39.3	39.5	39.7	39.1	39.1	39.2	39.8	39.8	40	40.5	40.3	39.8	39.4	40.1	40.2	39.7	39.8	39.8	39.4	39.3	39.4	39.3	39.3	39	39.2	39.4		4
87	MLV	39.1	39.5	39.8	39.2	39.2	39.2	39.2	39.7	40.5	40.5	40.4	39.8	39.3	39	39.5	38.9	39.1	39	39	39	39	39.1	39	39	39.1	39.2		3
96	MLV	39.5	39.9	39.5	39.5	39.3	39
98	MLV	39.3	39.9	39.5	39.2	39.3	39.1	39.5	41.1	39.5	39.7	39.8	39.4	39.3	40.7	39.8	39.5	40.7	39.7	39.5	39.9	39.4	39.9	40	39.8	41	39.1		4

## Sheet: Activity
Ear tag	Group	Activity score - DPC
		0	1	2	3	4	5	6	7	8	9	10	11	12	13	14	15	16	17	18	19	20
69	Mock	0	0	0	0	1	0	0	0	0	1	0	0	0	0	0	0	0	0	0	0	0
86	Mock	0	0	0	0	0	0	0	0	0	0	0	0	0	0	0	0	0	0	0	0	0
89	Mock	0	0	0	0	0	0	0	0	0	0	0	0	0	0	1	0	0	0	0	0	0
90	Mock	0	0	0	0	0	0	0	0	0	0	0	0	0	0	0	0	0	0	0	0	0
92	Mock	0	0	0	0	0	0	0	0	0	0	0	0	0	0	0	0	0	0	0	0	0
95	Mock	0	0	0	0	0	0	0	0	0	0	0	0	0	0	0	0	0	0	0	0	0
75	UnV	0	1	0	0	0	0	0	1	1	1	0	1	2	2	0	0	1	1	0	1	0
76	UnV	0	0	0	0	0	0	1	1	1	1	0	0	0	1	0	0	0	0	0	0	0
79	UnV	0	0	1	0	0	1	1	0	0	0	0	0	1	0	0	1	0	1	1	0	1
84	UnV	0	0	0	0	0	1	0	1	0	0	1	3	3	3
88	UnV	0	0	0	0	0	0	1	0	1	1	0	0	0	0	0	0	0	1	0	0	0
100	UnV	0	0	0	0	0	0	0	0	0	0	0	0	1	0	0	0	1	1	0	1	0
72	MLV	0	0	0	0	0	0	0	0	0	0	0	0	0	0	0	0	0	0	0	0	0
73	MLV	0	0	0	0	0	0	0	0	0	0	0	0	0	0	0	0	0	0	0	0	0
78	MLV	0	0	0	0	0	1	0	0	0	0	0	0	0	0	0	0	0	0	0	0	0
87	MLV	0	0	0	0	0	0	0	0	0	0	0	0	0	0	0	0	0	0	0	0	0
96	MLV	0
98	MLV	0	0	0	0	0	0	0	0	0	0	0	1	1	1	2	1	0	1	0	1	0

## Sheet: Respiratory
Ear tag	Group	Respiratory score -DPC
		0	1	2	3	4	5	6	7	8	9	10	11	12	13	14	15	16	17	18	19	20
69	Mock	0	0	0	0	0	0	0	0	0	0	0	0	0	0	0	0	0	0	0	0	0
86	Mock	0	0	0	0	0	0	0	0	0	0	0	0	0	0	0	0	0	0	0	0	0
89	Mock	0	0	0	0	0	0	0	0	0	0	0	0	0	0	0	0	0	0	0	0	0
90	Mock	0	0	0	0	0	0	0	0	0	0	0	0	0	0	0	0	0	0	0	0	0
92	Mock	0	0	0	0	0	0	0	0	0	0	0	0	0	0	0	0	0	0	0	0	0
95	Mock	0	0	0	0	0	0	0	0	0	0	0	0	0	0	0	0	0	0	0	0	0
75	UnV	0	2	2	2	1	0	2	3	3	4	4	4	4	5	3	4	4	5	4	4	4
76	UnV	0	0	0	2	0	0	2	2	2	4	2	2	4	3	4	4	4	4	4	4	4
79	UnV	0	2	0	0	0	1	1	0	2	2	2	3	4	4	3	4	4	4	4	4	4
84	UnV	0	2	1	2	0	1	3	2	3	3	4	4	4	6
88	UnV	0	3	3	3	2	0	3	3	4	4	4	4	6	4	4	5	5	5	5	5	5
100	UnV	0	0	2	0	1	0	1	2	3	2	2	2	4	3	4	4	4	5	5	5	6
72	MLV	0	1	1	0	1	2	3	3	3	3	3	3	3	4	4	4	4	3	4	4	4
73	MLV	0	0	0	0	0	0	0	2	4	2	2	1	1	1	2	4	3	4	4	3	2
78	MLV	0	0	0	1	2	2	0	0	2	2	2	1	1	2	4	2	2	2	2	2	2
87	MLV	0	0	0	0	0	0	0	1	1	2	1	2	2	2	2	2	2	4	3	2	4
96	MLV	0
98	MLV	0	1	1	1	2	1	2	2	3	3	2	4	5	4	4	4	4	4	4	4	4

## Sheet: Food intake
Group	Quantitues of food intakes (kg/group) - DPC
	0	1	2	3	4	5	6	7	8	9	10	11	12	13	14	15	16	17	18	19	20
Mock	5.2	6.5	3.9	6.5	6.5	6.5	6.5	6.5	7.8	6.5	6.5	7.8	6.5	7.8	7.8	6.5	6.5	3.9	6.5	6.5	6.5
UnV	3.9	3.9	1.3	2.6	2.6	2.6	2.6	2.6	2.6	1.3	2.6	2.6	3.9	2.6	5.2	6.5	5.2	3.9	7.8	3.9	3.9
MLV	5.2	5.2	3.9	2.6	3.9	2.6	3.9	3.9	3.9	5.2	5.2	5.2	5.2	5.2	5.2	5.2	5.2	3.9	7.8	3.9	3.9
	FI (kg/pig)			ADWG (g/pig/day)		FCR
Period (DPC)	0-10	11-20	0-20	0-10	0-20	0-10	0-20
Mock	1.06167	1.105	1.08333	763	781	1.39144	1.41485
UnV	0.411667	0.91	0.660833	98	405	4.20068	2.24691
MLV	0.806	1.014	0.91	610	550	1.32131	1.84364
Abbreviation: DPC, day-post-challenge; FI, food intake; ADWG, average daily weight gain; FCR, food conversion rate.

## Sheet: Body weight
Ear tag	Group	Body weight (kg)					ADWG (g/pig/day)
		-28 DPC	-14 DPC	0 DPC	10 DPC	20 DPC	0-10 DPC	0-20 DPC
69	Mock	4.84	9.9	16.6	24.7	32.3	810	785
86	Mock	5.12	9.9	15.3	24.6	32.37	930	853.5
89	Mock	5.37	10.5	16.5	23.4	32.6	690	805
90	Mock	6.12	10.37	16.9	24	31.3	710	720
92	Mock	5.91	11.6	17.9	26	35.02	810	856
95	Mock	5.83	9.85	16.3	22.6	29.66	630	668
75	UnV	5.45	10.4	18.8	18.6	25.85	-20	352.5
76	UnV	5.14	9.4	16.4	17.6	24.84	120	422
79	UnV	5.47	10.2	16.9	17.5	23.98	60	354
84	UnV	5.33	10.9	18.3	18.7		40
88	UnV	6.07	10.7	17.5	19.2	25.35	170	392.5
100	UnV	5.82	10.7	18.6	20.8	28.72	220	506
72	MLV	5.84	10.25	17.5	24.2	30.95	670	672.5
73	MLV	5.72	10.5	17.6	24.4	30.75	680	657.5
78	MLV	5.65	10.66	17.6	22.8	27.37	520	488.5
87	MLV	5.83	10.01	17.1	23.3	25.7	620	430
96	MLV	5.72	10.4	17.2
98	MLV	5.57	11.49	17.6	23.2	27.64	560	502

## Sheet: Pathology
Ear tag	Group	Macroscopic	Microscopic
69	Mock	0.0166667	0.333333
86	Mock	0.0354167	0.466667
89	Mock	0.00416667	0.5
90	Mock	0.0125	1
92	Mock	0.0145833	1.1
95	Mock	0.0270833	0.5
75	UnV	0.25625	1.3
76	UnV	0.30625	1.9
79	UnV	0.277083	1.93333
84	UnV	0.9125	2.73333
88	UnV	0.386458	1.83333
100	UnV	0.127083	2.1
72	MLV	0.120833	1.03333
73	MLV	0.152083	1.46667
78	MLV	0.135417	1.36667
87	MLV	0.13125	1.36667
98	MLV	0.440625	1.56667
Note: Both of the macro- and microscopic scores were evaluated by three pathologists and averaged.

## Sheet: Viremia
Ear tag	Group	PRRSV viremia titer (log10 copies/μl) - DPC
		-28	-14	0	4	7	10	14	21
69	Mock	0	0	0	0	0	0	0	0
86	Mock	0	0	0	0	0	0	0	0
89	Mock	0	0	0	0	0	0	0	0
90	Mock	0	0	0	0	0	0	0	0
92	Mock	0	0	0	0	0	0	0	0
95	Mock	0	0	0	0	0	0	0	0
75	UnV	0	0	0	6.92737	4.61429	5.19787	3.29854	2.83123
76	UnV	0	0	0	7.37239	3.75653	4.6742	4.05363	2.24692
79	UnV	0	0	0	6.39245	4.18103	5.33445	2.23191	0.676563
84	UnV	0	0	0	7.13717	6.47213	6.82958	6.44226
88	UnV	0	0	0	7.26751	5.62853	4.01584	4.74797	2.39245
100	UnV	0	0	0	5.95424	2.26143	4.93737	2.56954	2.86906
72	MLV	0	1.74396	1.18347	5.51284	3.80111	3.93262	2.22752	2.70021
73	MLV	0	1.56144	1.76938	5.32925	3.15054	4.80754	3.83178	1.46961
78	MLV	0	1.11203	1.18347	5.15316	4.00124	4.50939	2.67891	0.827369
87	MLV	0	1.72193	0.341293	5.31145	3.37553	2.81042	1.99751	2.09442
96	MLV	0	3.06016	0
98	MLV	0	2.03342	0.734457	4.36922	3.02296	4.49535	3.58819	2.53294

## Sheet: ELISA Ab
Ear tag	Group	PRRSV ELISA Ab (S/P ratio) - DPC
		-28	-21	-14	-7	0	7	14	21
69	Mock	0	0	0	0	0	0	0	0
86	Mock	0	0	0	0	0	0	0	0
89	Mock	0	0	0	0	0	0	0	0
90	Mock	0	0	0	0	0	0	0	0
92	Mock	0	0	0	0	0	0	0	0
95	Mock	0	0	0	0	0	0	0	0
76	UnV	0	0	0	0	0	1.035	0.905	1.368
75	UnV	0	0	0	0	0	1.085	1.656	1.99
100	UnV	0	0	0	0	0	0.761	2.383	2.265
74	UnV	0	0	0	0	0	1.474	2.148	2.439
79	UnV	0	0	0	0	0	1.476	2.558	2.607
84	UnV	0	0	0	0	0	1.684
98	MLV	0	0	0.091	0.433	0.786	1.105	1.266	1.479
73	MLV	0	0	1.436	1.614	1.906	2.6	2.381	2.203
72	MLV	0	0.005	1.752	2.33	2.721	2.951	2.909	2.653
87	MLV	0	0.056	1.939	2.031	2.221	3.127	3.045	2.793
78	MLV	0	0	1.622	2.22	2.392	3.624	3.168	3.213
96	MLV	0	0.01	1.028	1.552	2.275

## Sheet: IFN-g-SC
Ear tag	Group	0 DPC						20 DPC
		Virus 1	Virus 2	Medium 1	Medium 2	PRRSV-specific IFNg-SC (per 10^6 PBMC)		Virus 1	Virus 2	Medium 1	Medium 2	PRRSV-specific IFNg-SC (per 10^6 PBMC)
69	Mock	6	6	4	2	6		3	4	2	6	-1
86	Mock	1	2	2	2	-1		5	3	4	4	0
89	Mock	18	22	28	34	-22		2	7	2	0	7
90	Mock	21	18	23	27	-11		17	18	6	8	21
92	Mock	22	20	2	8	32		3	10	3	3	7
95	Mock	7	8	7	11	-3		3	6	4	2	3
74	UnV	6	6	12	11	-11		156	166	132	150	40
75	UnV	20	20	15	15	10		189	160	166	170	13
76	UnV	6	7	3	5	5		84	71	72	78	5
79	UnV	2	7	5	5	-1		202	207	205	217	-13
84	UnV	3	1	4	2	-2
100	UnV	2	2	3	1	0		76	78	64	67	23
72	MLV	7	11	6	6	6		35	31	3	2	61
73	MLV	2	3	5	3	-3		22	26	8	11	29
78	MLV	5	1	7	9	-10		18	13	12	9	10
87	MLV	1	4	2	0	3		11	9	6	6	8
96	MLV	19	20	16	16	7
98	MLV	7	7	2	4	8		25	22	13	10	24

## Sheet: Post-vaccination observation
Ear tag	Group	Body temperature (℃)						Activity score						Respiratory score
		4 HPV	24 HPV	1 DPV	7 DPV	14 DPV		4 HPV	24 HPV	1 DPV	7 DPV	14 DPV		4 HPV	24 HPV	1 DPV	7 DPV	14 DPV
69	Mock	39.1	39.3	38.9	39.4	39.1		0	0	0	0	0		0	0	0	0	0
86	Mock	39.4	39	39	39.8	39.5		0	0	0	0	0		0	0	0	0	0
89	Mock	39.5	39.3	39.1	39.1	39.3		0	0	0	0	0		0	0	0	0	0
90	Mock	40.3	39.4	39.1	39.3	39.3		0	0	0	0	0		0	0	0	0	0
92	Mock	39.7	39.2	39.1	39	39.4		0	0	0	0	0		0	0	0	0	0
95	Mock	38.9	39.1	38.9	39.3	39.5		0	0	0	0	0		0	0	0	0	0
75	UnV	39.3	39.3	39.1	39.4	39.5		0	0	0	0	0		0	0	0	0	0
76	UnV	39.4	39.2	39.2	39.7	39.4		0	0	0	0	0		0	0	0	0	0
79	UnV	39.2	39.4	39.4	39.2	39.4		0	0	0	0	0		0	0	0	0	0
84	UnV	39.5	39.1	39	39.4	39.2		0	0	0	0	0		0	0	0	0	0
88	UnV	39.4	39.3	39.2	39.7	39.8		0	0	0	0	0		0	0	0	0	0
100	UnV	39	39.1	38.9	39.2	39.1		0	0	0	0	0		0	0	0	0	0
72	MLV	39.1	39	38.6	39.3	39.1		0	0	0	0	0		0	0	0	0	0
73	MLV	38.9	39.2	38.9	39.1	39		0	0	0	0	0		0	0	0	0	0
78	MLV	39.2	39.3	39.1	39.1	39.2		0	0	0	0	0		0	0	0	0	0
87	MLV	39.2	39.3	38.9	39.3	39.1		0	0	0	0	0		0	0	0	0	0
96	MLV	38.8	39.4	39.1	39.3	39.2		0	0	0	0	0		0	0	0	0	0
98	MLV	39.4	39.4	39.3	38.9	38.8		0	0	0	0	0		0	0	0	1	0
